# Supplementary material
Source: PubMed Central journal article supplement (PMC5411331)
Supplement: NIHMS788656-supplement-7.pdf [file NIHMS788656-supplement-7.pdf]

**Genes associated with "Behavior"**

| Categories                                             | Diseases or Functions Annotation | p-Value  | Molecules                                                                                                                                                                                                                                                                                                                                                                                                                                                                                                                                                                                                                                                                                                                                                                                                                                                                       | # Molecules |
|--------------------------------------------------------|----------------------------------|----------|---------------------------------------------------------------------------------------------------------------------------------------------------------------------------------------------------------------------------------------------------------------------------------------------------------------------------------------------------------------------------------------------------------------------------------------------------------------------------------------------------------------------------------------------------------------------------------------------------------------------------------------------------------------------------------------------------------------------------------------------------------------------------------------------------------------------------------------------------------------------------------|-------------|
| Behavior                                               | contextual conditioning          | 3.91E-04 | ABI2, ARC, CAMK2B, CREM, DRD1, FEZ1, GABRD, GRM1, GRM7, ITM2B, KALRN, MECP2, MMP9, PLAT, TSC2, UCHL1, VDAC3                                                                                                                                                                                                                                                                                                                                                                                                                                                                                                                                                                                                                                                                                                                                                                     | 17          |
| Behavior                                               | conditioning                     | 5.81E-04 | ABI2, ARC, BACE1, CAMK2B, CARTPT, CNR1, CREM, DRD1, FEZ1, GABBR1, GABRD, GAD2, GRM1, GRM7, HOMER1, ITM2B, KALRN, KCNMA1, MAPK1, MECP2, MMP9, NAMPT, PDYN, PLAT, PRKACB, PRLHR, SGK1, TH, TLR4, TSC2, UCHL1, VDAC3                                                                                                                                                                                                                                                                                                                                                                                                                                                                                                                                                                                                                                                               | 32          |
| Behavior                                               | anxiety                          | 1.41E-03 | AKAP5, BACE1, BAG1, CAMK2B, CARTPT, CNR1, CREM, CRHR2, GABBR1, GABRD, GAD2, GRIA4, HOMER1, HRH3, IGF1, KALRN, KCNC2, LRRN1, MAPK1, MECP2, MMP9, NAMPT, NFATC3, NPEPPS, NTAN1, PDYN, PLAT, TAC1, TSN                                                                                                                                                                                                                                                                                                                                                                                                                                                                                                                                                                                                                                                                             | 29          |
| Behavior                                               | behavior                         | 1.42E-03 | ABI2, ACACB, ADM, ADRA1A, ADRB3, AGA, AKAP5, AP1S2, APLN, AQP4, ARC, ARF4, ARL6IP5, ASAH1, ASNA1, B2M, BACE1, BAG1, BAMBI, BIN1, CACNA1G, CACNB1, CAMK2B, CAPRIN1, CARTPT, CDK5, CDO1, CHST8, CISD2, CNR1, CPE, CREM, CRHR2, CYP19A1, DERL2, DGAT2, DISC1, DRD1, EGR3, FEZ1, GABBR1, GABRD, GAD2, GALNS, GCK, GCNT4, GLRB, GNAO1, GNG13, GRIA4, GRM1, GRM7, HDAC3, HOMER1, HPRT1, HRH3, HTR5A, HTR6, IFT20, IGF1, ITM2B, JAK1, JPH1, KALRN, KCNC1, KCNC2, KCNMA1, KISS1R, LEF1, LMO4, LRRN1, MAGED1, MAGEL2, MAPK1, MECP2, MGAT2, MMP9, MUT, NAMPT, NDN, NDUFS4, NFATC3, NHLRC1, NPEPPS, NPR3, NRCAM, NRG1, NTAN1, NTRK3, OPN4, OXTR, PARK7, PBX1, PDE4DIP, PDYN, PGR, PKM, PLAT, PLCB1, PLIN2, POU2F2, PPP1R14C, PRKCB, PRLHR, PTPN2, RAC1, RTN4, SCP2, SDK1, SGK1, SLC10A4, SNCA, SNRPN, SP4, TAC1, TH, TLR4, TMOD2, TPST1, TSC2, TSN, UBE2Q1, UCHL1, UCHL3, VDAC3, XPA, ZIC1 | 127         |
| Behavior, Nervous System Development and Function      | recognition memory               | 1.70E-03 | ARC, BACE1, CAMK2B, CNR1, CRHR2, GRIA4, HDAC3, ITM2B, MAPK1, NHLRC1, OXTR, PDYN                                                                                                                                                                                                                                                                                                                                                                                                                                                                                                                                                                                                                                                                                                                                                                                                 | 12          |
| Behavior, Nervous System Development and Function      | object recognition memory        | 2.55E-03 | CAMK2B, CNR1, GRIA4, HDAC3, ITM2B, NHLRC1, PDYN                                                                                                                                                                                                                                                                                                                                                                                                                                                                                                                                                                                                                                                                                                                                                                                                                                 | 7           |
| Behavior                                               | learning                         | 2.87E-03 | ABI2, AGA, AKAP5, AP1S2, ARC, ARF4, ARL6IP5, ASNA1, BACE1, CACNA1G, CAMK2B, CDK5, CNR1, CREM, CRHR2, CYP19A1, DRD1, GABBR1, GABRD, GALNS, GRIA4, GRM7, HDAC3, HOMER1, HRH3, HTR6, IFT20, IGF1, ITM2B, KALRN, LMO4, MAPK1, MECP2, MMP9, NAMPT, NDN, NHLRC1, NRCAM, NRG1, NTAN1, NTRK3, OXTR, PARK7, PDYN, PKM, PLAT, PLCB1, RTN4, SGK1, SNCA, TAC1, TH, TMOD2, TSC2, TSN, VDAC3                                                                                                                                                                                                                                                                                                                                                                                                                                                                                                  | 56          |
| Behavior                                               | cognition                        | 3.63E-03 | ABI2, AGA, AKAP5, AP1S2, ARC, ARF4, ARL6IP5, ASNA1, BACE1, CACNA1G, CAMK2B, CDK5, CHMP2B, CNR1, CREM, CRHR2, CYP19A1, DRD1, GABBR1, GABRD, GALNS, GRIA4, GRM7, HDAC3, HOMER1, HRH3, HTR6, IFT20, IGF1, ITM2B, KALRN, LMO4, MAPK1, MECP2, MMP9, NAMPT, NDN, NHLRC1, NIPBL, NRCAM, NRG1, NTAN1, NTRK3, OXTR, PARK7, PDYN, PKM, PLAT, PLCB1, RTN4, SGK1, SNCA, TAC1, TH, TMOD2, TSC2, TSN, TUSC3, UCHL1, VDAC3                                                                                                                                                                                                                                                                                                                                                                                                                                                                     | 60          |
| Behavior                                               | place preference                 | 4.46E-03 | CARTPT, CNR1, HOMER1, MMP9, PDYN, PLAT, PRLHR, TH, TLR4                                                                                                                                                                                                                                                                                                                                                                                                                                                                                                                                                                                                                                                                                                                                                                                                                         | 9           |
| Behavior                                               | locomotion                       | 4.70E-03 | ADARB1, ATP2A2, BACE1, BAG1, CARTPT, CNR1, CREM, CYP19A1, DRD1, EGR3, FIG4, GABBR1, GAD2, GALNS, GLRB, GNAO1, GPR88, GRM1, HINT1, HOMER1, HPRT1, HRH3, IGF1, KCNC1, KCNMA1, MECP2, MMP9, NAMPT, NDUFS4, NFATC3, NOVA1, NRCAM, NTAN1, PARK7, PRKCB, RRN3, RTN4, SEZ6L2, SNCA, SPP1, TARDBP, TH, TSN, UCHL1, UCHL3, ZIC1                                                                                                                                                                                                                                                                                                                                                                                                                                                                                                                                                          | 46          |
| Behavior                                               | aversive behavior                | 5.19E-03 | ARC, CARTPT, DRD1, GAD2, GRM7, PDYN, PLAT, TH                                                                                                                                                                                                                                                                                                                                                                                                                                                                                                                                                                                                                                                                                                                                                                                                                                   | 8           |
| Behavior, Organismal Functions                         | backward walking                 | 5.26E-03 | MMP9, NDUFS4                                                                                                                                                                                                                                                                                                                                                                                                                                                                                                                                                                                                                                                                                                                                                                                                                                                                    | 2           |
| Behavior                                               | immobility behavior              | 5.26E-03 | DISC1, MECP2                                                                                                                                                                                                                                                                                                                                                                                                                                                                                                                                                                                                                                                                                                                                                                                                                                                                    | 2           |
| Behavior                                               | lever press response             | 5.26E-03 | CNR1, HOMER1                                                                                                                                                                                                                                                                                                                                                                                                                                                                                                                                                                                                                                                                                                                                                                                                                                                                    | 2           |
| Behavior                                               | play behavior                    | 5.26E-03 | CNR1, MECP2                                                                                                                                                                                                                                                                                                                                                                                                                                                                                                                                                                                                                                                                                                                                                                                                                                                                     | 2           |
| Behavior, Nervous System Development and Function      | memory                           | 5.35E-03 | ARC, ARL6IP5, BACE1, CAMK2B, CNR1, CREM, CRHR2, CYP19A1, DRD1, GABBR1, GABRD, GALNS, GRIA4, GRM7, HDAC3, HOMER1, HRH3, IGF1, ITM2B, KALRN, MAPK1, MECP2, NAMPT, NHLRC1, NRG1, NTAN1, NTRK3, OXTR, PDYN, PKM, PLCB1, SGK1, SNCA, TAC1, TH                                                                                                                                                                                                                                                                                                                                                                                                                                                                                                                                                                                                                                        | 35          |
| Behavior, Nervous System Development and Function      | spatial memory                   | 6.34E-03 | ARL6IP5, BACE1, CNR1, CYP19A1, GRIA4, GRM7, HOMER1, IGF1, ITM2B, KALRN, NAMPT, NRG1, NTAN1, PDYN, SGK1, TH                                                                                                                                                                                                                                                                                                                                                                                                                                                                                                                                                                                                                                                                                                                                                                      | 16          |
| Behavior                                               | habituation                      | 7.71E-03 | BACE1, DRD1, GABBR1, HOMER1, NAMPT                                                                                                                                                                                                                                                                                                                                                                                                                                                                                                                                                                                                                                                                                                                                                                                                                                              | 5           |
| Behavior, Reproductive System Development and Function | mating behavior                  | 9.11E-03 | CYP19A1, DRD1, IGF1, KISS1R, NPEPPS, PGR, SP4, TH, UBE2Q1                                                                                                                                                                                                                                                                                                                                                                                                                                                                                                                                                                                                                                                                                                                                                                                                                       | 9           |
| Behavior                                               | motor learning                   | 9.92E-03 | ARL6IP5, CACNA1G, MECP2, NRCAM, PARK7, PLAT, RTN4                                                                                                                                                                                                                                                                                                                                                                                                                                                                                                                                                                                                                                                                                                                                                                                                                               | 7           |

|                                                     |                                   |          |                                                                                                                                                                                                                           |    |
|-----------------------------------------------------|-----------------------------------|----------|---------------------------------------------------------------------------------------------------------------------------------------------------------------------------------------------------------------------------|----|
| Behavior                                            | active avoidance response         | 1.16E-02 | CNR1, NTAN1, PLAT, TH                                                                                                                                                                                                     | 4  |
| Behavior                                            | emotional behavior                | 1.23E-02 | ADRA1A, ARC, B2M, CARTPT, CNR1, CRHR2, CYP19A1, DRD1, EGR3, GABBR1, GABRD, GAD2, GCNT4, GNAO1, GRM7, HOMER1, HPRT1, IGF1, MAGED1, MAPK1, MECP2, MGAT2, MMP9, NDUFS4, NTAN1, OPN4, OXTR, PDYN, PLAT, TH, TPST1, TSN, VDAC3 | 33 |
| Behavior                                            | sexual behavior                   | 1.32E-02 | CYP19A1, DRD1, GRM1, IGF1, KISS1R, NPEPPS, PGR, SP4, TH, UBE2Q1                                                                                                                                                           | 10 |
| Behavior, Organismal Functions                      | walking                           | 1.33E-02 | DRD1, GLRB, KCNMA1, MMP9, NAMPT, NDUFS4, UCHL1, UCHL3, ZIC1                                                                                                                                                               | 9  |
| Behavior                                            | social behavior                   | 1.42E-02 | CNR1, DISC1, DRD1, GABBR1, IGF1, KALRN, MAGED1, MAPK1, MECP2, MMP9, NFATC3, NTAN1, OXTR, RTN4                                                                                                                             | 14 |
| Behavior                                            | barbering behavior                | 1.50E-02 | CHST8, CYP19A1                                                                                                                                                                                                            | 2  |
| Behavior, Digestive System Development and Function | suckling                          | 1.63E-02 | BIN1, DERL2, DGAT2, JAK1, JPH1, MAGEL2, MUT, OXTR, POU2F2, SNRPN, UBE2Q1, ZIC1                                                                                                                                            | 12 |
| Behavior, Nervous System Development and Function   | long-term memory                  | 1.64E-02 | ARC, CREM, GABBR1, HDAC3, ITM2B, MAPK1, MECP2, PKM, SGK1, TAC1                                                                                                                                                            | 10 |
| Behavior                                            | abnormal initiation of locomotion | 2.08E-02 | ATP2A2, BACE1, CYP19A1, HRH3, MECP2, NFATC3, NRCAM, PARK7, SNCA                                                                                                                                                           | 9  |
| Behavior                                            | cued conditioning                 | 2.08E-02 | ARC, CREM, FEZ1, GABRD, MECP2, PLAT, PRKACB, TH, VDAC3                                                                                                                                                                    | 9  |
