# Supplementary material
Source: PubMed Central journal article supplement (PMC5411331)
Supplement: NIHMS788656-supplement-8.pdf [file NIHMS788656-supplement-8.pdf]

**Genes associated with "Neurological Disease"**

| Categories                                            | Diseases or Functions Annotation | p-Value  | Molecules                                                                                                                                                                                                                                                                                                                                                                                                                                                                                                                                                                                                                                                                                                                                                                                                                                                                                                                                                                                                                                                                                                                                                                                                                                                        | # Molecules |
|-------------------------------------------------------|----------------------------------|----------|------------------------------------------------------------------------------------------------------------------------------------------------------------------------------------------------------------------------------------------------------------------------------------------------------------------------------------------------------------------------------------------------------------------------------------------------------------------------------------------------------------------------------------------------------------------------------------------------------------------------------------------------------------------------------------------------------------------------------------------------------------------------------------------------------------------------------------------------------------------------------------------------------------------------------------------------------------------------------------------------------------------------------------------------------------------------------------------------------------------------------------------------------------------------------------------------------------------------------------------------------------------|-------------|
| Neurological Disease                                  | Movement Disorders               | 9.47E-12 | ABCB1, ACP1, ADORA3, ADRA1A, ADRA2B, ADRB3, AGA, AIG1, AMY2A, AMY2B, ANO10, AP1S2, AQP4, ARL3, ARL6IP5, ARPP21, ATP2A1, ATP2A2, ATP5J, ATP6V1E1, B2M, B3GNT2, B4GAT1, BACE1, C2orf40, CA2, CA8, CACNA1G, CAMK2B, CAPZB, CARTPT, CDK5, CETN2, CHGB, CLU, CNR1, COQ2, CPB2, CPE, CSRP2, CYP19A1, DGKB, DIRAS2, DNAJA1, DNAJB6, DRD1, EGR3, EIF4A2, ETFB, FAM117A, FARSB, FGFRL1, FKBP1A, GABBR1, GABRD, GAD2, GAP43, GLRB, GNAO1, GNG3, GNPTAB, GPR88, GRM1, HADH, HINT1, HOMER1, HPRT1, HSPA5, HSPA8, HSPB1, HTR6, IGF1, IP6K2, ISOC1, ITPA, KCNA5, KCNC1, KCNC2, KCNH2, KCNMA1, LAPTM4B, LDHA, LRG1, LRRN1, MAP2K4, MAP2K5, MARS2, MBD4, MBP, MDH1, MECP2, METTL9, MGAT2, MLF1, MMP9, MSRA, MT1M, MYCN, MYL12A, NAP1L5, NBEA, NCR1, NDUFA8, NDUFB3, NDUFB5, NDUFB6, NDUFS4, NGLY1, NHLRC1, NOP56, NPM1, NR1D1, NRCAM, NRG1, NTAN1, NTRK3, OPN1LW, OSBPL8, PARK7, PARL, PCMT1, PDE4DIP, PDYN, PFKFB1, PGRMC1, PIPNA, PKM, PLCB1, POLR2I, PRKCB, PTS, RAB11A, RAB6A, RASGRP2, RBFOX1, RNF170, RPL17, RPL31, RTN4, SAG, SCG2, SCP2, SDHA, SDHB, SEP15, SERPINA1, SERPINE1, SGCE, SGK1, SNCA, SPP1, SRD5A1, SRM, ST8SIA3, STARD10, STARD4, STMN1, SUB1, SUCLA2, TAC1, TARDBP, TGM2, TH, TLR4, TMED10, TPI1, TSN, TUBE1, UBB, UCHL1, UQCRB, XPA, ZBTB16, ZIC1, ZNF706 | 175         |
| Neurological Disease, Skeletal and Muscular Disorders | neuromuscular disease            | 3.22E-09 | ABCB1, ACP1, ADORA3, ADRA1A, ADRA2B, ADRB3, AIG1, AP1S2, AQP4, ARL3, ARL6IP5, ARPP21, ATP2A1, ATP2A2, ATP2C1, ATP5J, ATP6V1E1, B2M, B3GNT2, B4GAT1, C2orf40, CA2, CAMK2B, CAPZB, CDK5, CETN2, CHGB, CLU, CNR1, CSRP2, DGKB, DHFR, DIRAS2, DNAJA1, DNAJB6, DRD1, EIF4A2, ETFB, FAM117A, FARSB, FKBP1A, GABBR1, GABRD, GAD2, GAP43, GLRB, GNAO1, GNG3, GPR88, HADH, HINT1, HOMER1, HSPA5, HSPA8, HSPB1, HTR6, IGF1, IP6K2, ISOC1, KCNA5, KCNC1, KCNC2, KCNMA1, KLRC2, LAPTM4B, LDHA, LRG1, LRRN1, MAP2K4, MBP, MCCC1, MDH1, METTL9, MLF1, MT1M, MUT, MYL12A, NAP1L5, NBEA, NDUFA8, NDUFB3, NDUFB5, NDUFB6, NPM1, NR1D1, NRCAM, NRG1, OPN1LW, OSBPL8, PARK7, PARL, PCMT1, PDE4DIP, PFKFB1, PGRMC1, PKM, PLCB1, POLE2, POLR2I, PRKCB, PSMA4, RAB11A, RAB6A, RAPSIN, RASGRP2, RBFOX1, RPL17, RPL31, RTN4, SAG, SCG2, SDHA, SDHB, SEP15, SERPINA1, SGK1, SNCA, SPP1, SRD5A1, SRM, ST8SIA3, STARD10, STARD4, STMN1, SUB1, SUCLA2, TAC1, TACO1, TGM2, TH, TLR4, TMED10, TP53BP2, TPI1, TSN, UBB, UCHL1, UQCRB, XPA, ZBTB16, ZNF706                                                                                                                                                                                                                                       | 141         |
| Neurological Disease, Psychological Disorders         | disorder of basal ganglia        | 1.92E-11 | ABCB1, ACP1, ADORA3, ADRA1A, ADRA2B, ADRB3, AIG1, AP1S2, AQP4, ARL3, ARL6IP5, ARPP21, ATP2A1, ATP2A2, ATP5J, ATP6V1E1, B2M, B3GNT2, B4GAT1, C2orf40, CA2, CAMK2B, CAPZB, CDK5, CETN2, CHGB, CLU, CNR1, COQ2, CREM, CSRP2, DGKB, DIRAS2, DNAJA1, DNAJB6, DRD1, EIF4A2, ETFB, FAM117A, FARSB, GABRD, GAD2, GAP43, GLRB, GNAO1, GNG3, GPR88, HADH, HINT1, HOMER1, HSPA5, HSPA8, HSPB1, HTR6, IGF1, IP6K2, ISOC1, KCNA5, LAPTM4B, LDHA, LRG1, LRRN1, MAP2K4, MBP, MDH1, METTL9, MLF1, MT1M, MYL12A, NAP1L5, NBEA, NDUFA8, NDUFB3, NDUFB5, NDUFB6, NGLY1, NPM1, NR1D1, NRG1, OPN1LW, OSBPL8, PARK7, PARL, PCMT1, PDE4DIP, PFKFB1, PGRMC1, PKM, PLCB1, POLR2I, PRKCB, RAB11A, RAB39B, RAB6A, RASGRP2, RBFOX1, RNASEH2B, RPL17, RPL31, RTN4, SAG, SAMHD1, SCG2, SDHA, SDHB, SEP15, SERPINA1, SGK1, SNCA, SPP1, SRD5A1, SRM, ST8SIA3, STARD10, STARD4, STMN1, SUB1, SUCLA2, TAC1, TGM2, TH, TLR4, TMED10, TPI1, TREX1, TSN, TUBE1, UBB, UCHL1, UQCRB, XPA, ZBTB16, ZNF706                                                                                                                                                                                                                                                                                                | 133         |
| Neurological Disease                                  | neurological signs               | 4.50E-10 | ACP1, ADRA1A, ADRA2B, ADRB3, AIG1, APOA1, AQP4, ARL3, ARPP21, ATP2A1, ATP2A2, ATP5J, B2M, B3GNT2, B4GAT1, C2orf40, CA2, CAMK2B, CDK5, CETN2, CHGB, CLU, CNR1, CPB2, CSRP2, DGKB, DIRAS2, DNAJA1, DRD1, ETFB, FAM117A, GABRD, GAD2, GLRB, GNAO1, GNG3, GNPTAB, GPR88, HADH, HINT1, HOMER1, HRH3, HSPA5, HSPA8, HTR6, IGF1, IP6K2, ISOC1, ITM2B, KCNA5, KCNC1, KCNMA1, LAPTM4B, LDHA, LRG1, LRRN1, MAP2K4, METTL9, MLF1, MPO, MT1M, MYL12A, NAP1L5, NBEA, NDUFA8, NDUFB3, NDUFB5, NDUFB6, NGLY1, NPM1, NR1D1, NTRK3, OPN1LW, OSBPL8, PCMT1, PDE4DIP, PFKFB1, PGRMC1, PKM, PLCB1, POLR2I, PRKCB, RAB11A, RAB6A, RASGRP2, RBFOX1, SAG, SCG2, SDHA, SDHB, SERPINA1, SERPINE1, SGK1, SNCA, SRD5A1, SRM, ST8SIA3, STARD10, STARD4, SUB1, SUCLA2, TAC1, TARDBP, TGM2, TH, TPI1, TSN, UCHL1, UQCRB, XPA, ZBTB16, ZNF706                                                                                                                                                                                                                                                                                                                                                                                                                                                   | 112         |

|                                                                                                                                          |                               |          |                                                                                                                                                                                                                                                                                                                                                                                                                                                                                                                                                                                                                                                                                                                                                 |     |
|------------------------------------------------------------------------------------------------------------------------------------------|-------------------------------|----------|-------------------------------------------------------------------------------------------------------------------------------------------------------------------------------------------------------------------------------------------------------------------------------------------------------------------------------------------------------------------------------------------------------------------------------------------------------------------------------------------------------------------------------------------------------------------------------------------------------------------------------------------------------------------------------------------------------------------------------------------------|-----|
| Neurological Disease                                                                                                                     | dyskinesia                    | 1.05E-08 | ACP1, ADRA1A, ADRA2B, ADRB3, AIG1, AQP4, ARL3, ARPP21, ATP2A1, ATP2A2, ATP5J, B2M, B3GNT2, B4GAT1, C2orf40, CA2, CAMK2B, CDK5, CETN2, CHGB, CLU, CNR1, CSRP2, DGKB, DIRAS2, DNAJA1, DRD1, ETFB, FAM117A, GABRD, GAD2, GLRB, GNAO1, GNG3, GPR88, HADH, HINT1, HOMER1, HSPA5, HSPA8, HTR6, IGF1, IP6K2, ISOC1, KCNA5, KCNC1, KCNMA1, LAPTM4B, LDHA, LRG1, LRRN1, MAP2K4, METTL9, MLF1, MT1M, MYL12A, NAP1L5, NBEA, NDUFA8, NDUFB3, NDUFB5, NDUFB6, NGLY1, NPM1, NR1D1, NTRK3, OPN1LW, OSBPL8, PCMT1, PDE4DIP, PFKFB1, PGRMC1, PKM, PLCB1, POLR2I, PRKCB, RAB11A, RAB6A, RASGRP2, RBFOX1, SAG, SCG2, SDHA, SDHB, SERPINA1, SGK1, SRD5A1, SRM, ST8SIA3, STARD10, STARD4, SUB1, SUCLA2, TAC1, TGM2, TH, TPI1, TSN, UCHL1, UQCRB, XPA, ZBTB16, ZNF706 | 103 |
| Hereditary Disorder, Neurological Disease, Organismal Injury and Abnormalities, Psychological Disorders, Skeletal and Muscular Disorders | Huntington's Disease          | 1.20E-08 | ACP1, ADRA1A, ADRB3, AIG1, AQP4, ARL3, ARPP21, ATP2A1, ATP2A2, ATP5J, B2M, B3GNT2, B4GAT1, C2orf40, CA2, CAMK2B, CDK5, CETN2, CHGB, CLU, CNR1, CSRP2, DGKB, DIRAS2, DNAJA1, DRD1, ETFB, FAM117A, GABRD, GAD2, GLRB, GNAO1, GNG3, GPR88, HADH, HINT1, HOMER1, HSPA5, HSPA8, HTR6, IGF1, IP6K2, ISOC1, KCNA5, LAPTM4B, LDHA, LRG1, LRRN1, MAP2K4, METTL9, MLF1, MT1M, MYL12A, NAP1L5, NBEA, NDUFA8, NDUFB3, NDUFB5, NDUFB6, NPM1, NR1D1, OPN1LW, OSBPL8, PCMT1, PDE4DIP, PFKFB1, PGRMC1, PKM, PLCB1, POLR2I, PRKCB, RAB11A, RAB6A, RASGRP2, RBFOX1, SAG, SCG2, SDHA, SDHB, SERPINA1, SGK1, SRD5A1, SRM, ST8SIA3, STARD10, STARD4, SUB1, SUCLA2, TAC1, TGM2, TPI1, TSN, UCHL1, UQCRB, XPA, ZBTB16, ZNF706                                          | 97  |
| Cell Death and Survival, Neurological Disease                                                                                            | neuronal cell death           | 5.85E-03 | AARS, ADAM8, ADARB1, AGA, ALOX15, APLN, ASAH1, ATP2C1, BACE1, BAG1, BMP2, CAPRIN1, CDC42, CDK5, CIAPIN1, CLU, CNR1, CREM, DNM1L, FAM162A, FKBP1A, GAD2, GFRA4, GFRAL, GJB2, GLRX, GNAO1, GRM1, HDAC3, HGF, HPRT1, HSPA5, HSPB1, IGF1, INSM1, ITM2B, LDHA, MAGED1, MAP2K4, MAP2K5, MAPK1, MBP, MECP2, MMP9, MYCN, NFIL3, NGFRAP1, NOVA1, NPM1, NR1D1, NRCAM, NRG1, NTRK3, OSM, PARK7, PARL, PCDHGC3, PIKFYVE, PLAT, POLB, PRKCI, PSME3, PTPN6, RAC1, RAPSN, SDHA, SDHB, SERPINE1, SGK1, SH3GLB1, SLC25A38, SMAD3, SNCA, STAMBIP, STXBP1, SUMO1, TAC1, TARDBP, TGM2, TLR4, TP53BP2, TSC2, UBE2L3, UBE2V2, UCHL1, YWHAB                                                                                                                            | 86  |
| Neurological Disease                                                                                                                     | progressive motor neuropathy  | 4.16E-04 | ABCB1, ADORA3, ADRA1A, ADRA2B, ADRB3, ANXA5, AP1S2, AQP4, ARL6IP5, ARPP21, ATP6V1E1, C9orf72, CAPZB, CCT2, CDC42EP3, CHMP2B, CLU, CNR1, DHFR, DNAJB6, DRD1, EIF4A2, FAM149A, FARSB, FIG4, GABBR1, GABRD, GAD2, GAP43, GPNMB, HPRT1, HRASLS, HSPA5, HSPB1, IGF1, KCNA5, KCNC1, KCNC2, KCNMA1, KLRC2, LDHA, MAGED1, MAPK1, MBP, MCCD1, MDH1, MLF1, MUT, NFIL3, NRCAM, NRG1, PARK7, PARL, PLA2G4C, POLE2, RBFOX1, RPL17, RPL31, RTN4, SEP15, SGK1, SNCA, SPP1, STMN1, TAC1, TARDBP, TGM2, TH, TLR4, TMED10, TP53BP2, UBB, UCHL1                                                                                                                                                                                                                    | 73  |
| Neurological Disease                                                                                                                     | seizure disorder              | 3.40E-04 | AARS, ABCB1, ADARB1, ADM, ADRA1A, ADRA2B, ADRB3, AKAP5, ARC, ASAH1, BACE1, CA2, CACNA1G, CHGB, CLU, CNR1, CREM, DCX, DHFR, EGR3, GABBR1, GABRD, GAD2, GAP43, GNAO1, GNG3, GRIA4, GRM1, GRM7, HOMER1, HSPA8, IER3IP1, KCNC1, KCNC2, KCNMA1, KCNQ4, LUC7L3, ME2, MECP2, MMP9, NAMPT, NDUFS4, NFIL3, NGLY1, NHLRC1, NNAT, NRG1, NUDT11, PDE4DIP, PDYN, PGR, PITPNA, PLAT, PLCB1, RAC1, RBFOX1, SCG2, SLC10A4, SOCS3, SSTR1, STAG3L1, STXBP1, TAC1, TEF, TGM2, TMEM70, ZFP36                                                                                                                                                                                                                                                                        | 67  |
| Cancer, Neurological Disease, Organismal Injury and Abnormalities                                                                        | central nervous system cancer | 1.71E-02 | ACTN1, ADARB1, ADGRE5, ALAD, ATP2A2, BCCIP, CD93, CDK5, CKM, CLTB, CLU, COL4A1, CSRP2, CXCR6, DHFR, EGR3, FAM91A1, FOXD4L3/FOXD4L6, FRG1, GAP43, GNAO1, GPNMB, HGF, HSPA5, IGF1, KCNMA1, KDM4C, KHDRBS3, LDB3, MAL, MBP, MMP9, MOB4, MYCN, NAP1L3, NBEA, NPM1, PAIP2B, PCMT1, PKM, POLB, POLR2I, POT1, PRKCB, RAC1, RBFOX1, SEC61G, SERPINE1, SFRP1, SNCA, SOX17, SPP1, TLR4, TSC2, TSPYL4, TSPYL5, TUSC3, ZNF365                                                                                                                                                                                                                                                                                                                               | 58  |
| Neurological Disease                                                                                                                     | epilepsy                      | 2.10E-04 | AARS, ABCB1, ADM, ADRA1A, ADRA2B, ADRB3, ARC, ASAH1, CA2, CACNA1G, CHGB, CLU, CREM, DCX, DHFR, EGR3, GABBR1, GABRD, GAD2, GNAO1, HOMER1, HSPA8, IER3IP1, KCNC1, KCNC2, KCNMA1, KCNQ4, LUC7L3, ME2, NAMPT, NFIL3, NGLY1, NHLRC1, NNAT, NUDT11, PDE4DIP, PDYN, PLCB1, RAC1, SCG2, SOCS3, SSTR1, STXBP1, TAC1, TEF, TMEM70, ZFP36                                                                                                                                                                                                                                                                                                                                                                                                                  | 47  |
| Neurological Disease, Psychological Disorders, Skeletal and Muscular Disorders                                                           | Parkinson's disease           | 9.09E-05 | ABCB1, ADORA3, ADRA1A, ADRA2B, ADRB3, AP1S2, AQP4, ARL6IP5, ATP6V1E1, CAPZB, CNR1, DNAJB6, DRD1, EIF4A2, FARSB, GABRD, GAP43, HSPB1, IGF1, LDHA, MBP, MDH1, NRG1, PARK7, PARL, RPL17, RPL31, RTN4, SEP15, SGK1, SNCA, SPP1, STMN1, TAC1, TGM2, TH, TLR4, TMED10, UBB, UCHL1                                                                                                                                                                                                                                                                                                                                                                                                                                                                     | 40  |

|                                                                                                                                                                                                              |                                       |          |                                                                                                                                                                                                                                                                             |    |
|--------------------------------------------------------------------------------------------------------------------------------------------------------------------------------------------------------------|---------------------------------------|----------|-----------------------------------------------------------------------------------------------------------------------------------------------------------------------------------------------------------------------------------------------------------------------------|----|
| Cancer, Neurological Disease, Organismal Injury and Abnormalities                                                                                                                                            | glioblastoma cancer                   | 1.02E-02 | ACTN1, ADARB1, ADGRE5, ATP2A2, CD93, CDK5, CLU, COL4A1, CSRP2, CXCR6, EGR3, GAP43, GNAO1, GPNMB, HGF, HSPA5, IGF1, KCNMA1, LDB3, MAL, MBP, MMP9, MOB4, NAP1L3, NBEA, NPM1, PAIP2B, PKM, PRKCB, RAC1, RBFOX1, SEC61G, SNCA, SOX17, SPP1, TLR4, TSPYL4, TSPYL5, TUSC3, ZNF365 | 40 |
| Cell Death and Survival, Neurological Disease                                                                                                                                                                | cell death of cortical neurons        | 7.73E-03 | ALOX15, CDC42, CDK5, CLU, GNAO1, HDAC3, HSPA5, HSPB1, IGF1, MECP2, NFIL3, NGFRAP1, NTRK3, PARK7, PLAT, SERPINE1, SH3GLB1, SLC25A38, SNCA, TARDBP, TGM2, TLR4, UBE2L3, YWHAB                                                                                                 | 24 |
| Neurological Disease                                                                                                                                                                                         | epileptic seizure                     | 1.61E-02 | ADM, ARC, CHGB, CREM, EGR3, GABBR1, GABRD, HOMER1, HSPA8, KCNC1, KCNC2, NAMPT, NFIL3, NUDT11, PDE4DIP, PDYN, SCG2, SOCS3, SSTR1, TAC1, TMEM70, ZFP36                                                                                                                        | 22 |
| Hereditary Disorder, Neurological Disease, Organismal Injury and Abnormalities                                                                                                                               | hereditary neuropathy                 | 2.01E-02 | AARS, AMY2A, AMY2B, AP4B1, APOA1, C9orf72, CHMP2B, CISD2, CLU, DFNB59, FIG4, GARS, HSPB1, MARS2, MMP9, OPA3, PARK7, PRPS1, SNCA, TARDBP, TMEM126A, UCHL1                                                                                                                    | 22 |
| Hereditary Disorder, Neurological Disease, Organismal Injury and Abnormalities                                                                                                                               | Rett Syndrome                         | 3.05E-03 | ADRA1A, ADRA2B, ATP1B1, BEX4, CLU, CXCR6, DHCR24, DNAJB6, HACD1, LGALS8, MBP, MECP2, NGFRAP1, PDE4DIP, PITPNC1, PPAT, TACO1, YWHAB                                                                                                                                          | 18 |
| Neurological Disease, Psychological Disorders                                                                                                                                                                | post-traumatic stress disorder        | 8.89E-03 | ADRA1A, ADRA2B, ADRB3, CA2, CNR1, DRD1, GABRD, GAD2, HTR5A, HTR6, OXTR, PGR, TAC1                                                                                                                                                                                           | 13 |
| Cell Death and Survival, Neurological Disease                                                                                                                                                                | cell death of cerebellar cortex cells | 6.94E-03 | BAG1, CDK5, DNM1L, IGF1, MAP2K5, MECP2, NTRK3, PLAT, UBE2L3                                                                                                                                                                                                                 | 9  |
| Neurological Disease, Organismal Injury and Abnormalities                                                                                                                                                    | gliosis of central nervous system     | 2.08E-02 | AGA, BACE1, ITM2B, NAMPT, NDUFS4, PTGDR, SH3GLB1, SNCA, TARDBP                                                                                                                                                                                                              | 9  |
| Neurological Disease                                                                                                                                                                                         | myoclonus                             | 1.46E-02 | CACNA1G, GAD2, GLRB, KCNC1, KCNC2, NDUFS4, NHLRC1, SGCE                                                                                                                                                                                                                     | 8  |
| Cell Death and Survival, Neurological Disease                                                                                                                                                                | cell death of cerebellar granule cell | 9.92E-03 | BAG1, CDK5, IGF1, MAP2K5, MECP2, NTRK3, UBE2L3                                                                                                                                                                                                                              | 7  |
| Neurological Disease, Organismal Injury and Abnormalities                                                                                                                                                    | cerebral atrophy                      | 1.57E-02 | C9orf72, CHMP2B, NAMPT, PARK7, STAMBP, TARDBP, UBB                                                                                                                                                                                                                          | 7  |
| Neurological Disease, Psychological Disorders                                                                                                                                                                | hebephrenic schizophrenia             | 3.04E-03 | ADRA1A, ADRA2B, CNR1, DRD1, HTR5A, HTR6                                                                                                                                                                                                                                     | 6  |
| Neurological Disease                                                                                                                                                                                         | dysmyelination of axons               | 3.24E-03 | COPS5, EI24, NRCAM, PLAT, STMN1                                                                                                                                                                                                                                             | 5  |
| Hereditary Disorder, Neurological Disease, Organismal Injury and Abnormalities, Psychological Disorders                                                                                                      | familial frontotemporal dementia      | 5.92E-03 | C9orf72, CHMP2B, PARK7, TARDBP, UBB                                                                                                                                                                                                                                         | 5  |
| Neurological Disease, Psychological Disorders                                                                                                                                                                | undifferentiated schizophrenia        | 1.24E-02 | ADRA1A, ADRA2B, DRD1, HTR5A, HTR6                                                                                                                                                                                                                                           | 5  |
| Neurological Disease, Psychological Disorders                                                                                                                                                                | paranoid schizophrenia                | 1.86E-02 | ADRA1A, ADRA2B, DRD1, HTR5A, HTR6                                                                                                                                                                                                                                           | 5  |
| Developmental Disorder, Neurological Disease, Organismal Injury and Abnormalities                                                                                                                            | hypoplasia of telencephalon           | 4.07E-03 | INTU, MYCN, ZIC1, ZIC3                                                                                                                                                                                                                                                      | 4  |
| Metabolic Disease, Neurological Disease, Psychological Disorders                                                                                                                                             | experimental Alzheimer's disease      | 1.44E-03 | BACE1, CDK5, COPS5                                                                                                                                                                                                                                                          | 3  |
| Neurological Disease                                                                                                                                                                                         | hypermyelination of axons             | 6.46E-03 | DLG1, EED, SGK1                                                                                                                                                                                                                                                             | 3  |
| Hereditary Disorder, Neurological Disease, Organismal Injury and Abnormalities, Psychological Disorders                                                                                                      | Aicardi-Goutieres syndrome            | 1.07E-02 | RNASEH2B, SAMHD1, TREX1                                                                                                                                                                                                                                                     | 3  |
| Neurological Disease                                                                                                                                                                                         | alpha-synucleinopathy                 | 5.26E-03 | CLU, SNCA                                                                                                                                                                                                                                                                   | 2  |
| Cell Death and Survival, Neurological Disease                                                                                                                                                                | delay in cell death of Purkinje cells | 5.26E-03 | IGF1, PLAT                                                                                                                                                                                                                                                                  | 2  |
| Developmental Disorder, Neurological Disease, Organismal Injury and Abnormalities                                                                                                                            | hypoplasia of brain septum            | 5.26E-03 | ZIC1, ZIC3                                                                                                                                                                                                                                                                  | 2  |
| Developmental Disorder, Neurological Disease, Organismal Injury and Abnormalities                                                                                                                            | hypoplasia of hippocampus             | 5.26E-03 | ZIC1, ZIC3                                                                                                                                                                                                                                                                  | 2  |
| Hereditary Disorder, Neurological Disease, Organismal Injury and Abnormalities, Skeletal and Muscular Disorders                                                                                              | Charcot-Marie-Tooth disease type 1A   | 1.50E-02 | AMY2A, AMY2B                                                                                                                                                                                                                                                                | 2  |
| Hereditary Disorder, Neurological Disease, Organismal Injury and Abnormalities                                                                                                                               | LaFora epilepsy                       | 1.50E-02 | NHLRC1, NNAT                                                                                                                                                                                                                                                                | 2  |
| Cardiovascular Disease, Neurological Disease                                                                                                                                                                 | Moyamoya disease                      | 1.50E-02 | GUCY1A3, RNF213                                                                                                                                                                                                                                                             | 2  |
| Cancer, Dermatological Diseases and Conditions, Developmental Disorder, Hereditary Disorder, Neurological Disease, Organismal Injury and Abnormalities, Psychological Disorders, Reproductive System Disease | PIBIDS syndrome                       | 1.50E-02 | ERCC3, GTF2H5                                                                                                                                                                                                                                                               | 2  |

|                                                                                                         |                                                             |          |                |   |
|---------------------------------------------------------------------------------------------------------|-------------------------------------------------------------|----------|----------------|---|
| Hereditary Disorder, Neurological Disease, Organismal Injury and Abnormalities, Psychological Disorders | adult-onset leukoencephalopathy with vanishing white matter | 1.50E-02 | EIF2B3, EIF2B5 | 2 |
| Cancer, Neurological Disease, Organismal Injury and Abnormalities, Tumor Morphology                     | progression of primitive neuroectodermal tumor              | 1.50E-02 | MMP9, MYCN     | 2 |
