# Supplementary material
Source: PubMed Central journal article supplement (PMC5411331)
Supplement: NIHMS788656-supplement-13.pdf [file NIHMS788656-supplement-13.pdf]

Pleiotropy between "Neurological Disease", "Behavior/Psychological Disorders", "Cancer", "Organismal Injury/Skeletal and Muscular Disorders".

| 0 genes included exclusively in "Beh./Psych. Disorder": | 0 genes included exclusively in "Cancer": | 1 common element in "Neurological" and "Beh./Psych. Disorder": | 0 common genes in "Beh./Psych. Disorder" and "Cancer": | 954 common genes in "Cancer" and "Organ/Skeletal": | 7 genes included exclusively in "Neurological": | 0 common genes in "Neurological", "Beh./Psych. Disorder" and "Cancer": | 66 common genes in "Beh./Psych. Disorder", "Cancer" and "Organ/Skeletal": | 15 genes included exclusively in "Organ/Skeletal": | 177 common genes in "Neurological", "Beh./Psych. Disorder", "Cancer" and "Organ/Skeletal": | 0 common genes in "Neurological" and "Cancer": | 0 common genes in "Beh./Psych. Disorder" and "Organ/Skeletal": | 118 common genes in "Neurological", "Beh./Psych. Disorder" and "Organ/Skeletal": | 19 common genes in "Neurological", "Beh./Psych. Disorder" and "Organ/Skeletal": | 20 common genes in "Neurological" and "Organ/Skeletal": |
|---------------------------------------------------------|-------------------------------------------|----------------------------------------------------------------|--------------------------------------------------------|----------------------------------------------------|-------------------------------------------------|------------------------------------------------------------------------|---------------------------------------------------------------------------|----------------------------------------------------|--------------------------------------------------------------------------------------------|------------------------------------------------|----------------------------------------------------------------|----------------------------------------------------------------------------------|---------------------------------------------------------------------------------|---------------------------------------------------------|
| CD46                                                    |                                           | CARTPT                                                         |                                                        | AASDHPTT                                           | RNF170                                          |                                                                        | AB12                                                                      | BCKDHB                                             | ABCB1                                                                                      |                                                |                                                                | AARS                                                                             | AGA                                                                             | AMY2B                                                   |
| MRPL3                                                   |                                           |                                                                |                                                        | ABCA4                                              | CIAPIN1                                         |                                                                        | ACACB                                                                     | APOPT1                                             | ACP1                                                                                       |                                                |                                                                | ACTN1                                                                            | AGL                                                                             | HACD1                                                   |
| TMEM243                                                 |                                           |                                                                |                                                        | ABCC11                                             | FAM162A                                         |                                                                        | ARF4                                                                      | BANF1                                              | ADARB1                                                                                     |                                                |                                                                | ADAM8                                                                            | ARL3                                                                            | MCCD1                                                   |
|                                                         |                                           |                                                                |                                                        | ABT81                                              | IER3IP1                                         |                                                                        | ASNA1                                                                     | H2AF2                                              | ADM                                                                                        |                                                |                                                                | ADGRE5                                                                           | CETN2                                                                           | OPA3                                                    |
|                                                         |                                           |                                                                |                                                        | ACAT2                                              | NUDT11                                          |                                                                        | ATPSG3                                                                    | KCP                                                | ADORA3                                                                                     |                                                |                                                                | ALAD                                                                             | GRP88                                                                           |                                                         |
|                                                         |                                           |                                                                |                                                        | ACSL5                                              | PLA2G4C                                         |                                                                        | BAMBI                                                                     | MMADHC                                             | ADRA1A                                                                                     |                                                |                                                                | ALOX15                                                                           | HADH                                                                            |                                                         |
|                                                         |                                           |                                                                |                                                        | ACTA1                                              | SUMO1                                           |                                                                        | BIN1                                                                      | NDUFA12                                            | ADRA2B                                                                                     |                                                |                                                                | AMY2A                                                                            | MT1M                                                                            |                                                         |
|                                                         |                                           |                                                                |                                                        | ACTR1A                                             |                                                 |                                                                        | CACNB1                                                                    | NDUFAF1                                            | ADRB3                                                                                      |                                                |                                                                | ANO10                                                                            | NDUF86                                                                          |                                                         |
|                                                         |                                           |                                                                |                                                        | ACTR3                                              |                                                 |                                                                        | CDO1                                                                      | NDUFAF4                                            | AIG1                                                                                       |                                                |                                                                | ANXAS                                                                            | PARL                                                                            |                                                         |
|                                                         |                                           |                                                                |                                                        | ACTR9B                                             |                                                 |                                                                        | CHST8                                                                     | PCBD1                                              | AKAP5                                                                                      |                                                |                                                                | AP4B1                                                                            | PFKFB1                                                                          |                                                         |
|                                                         |                                           |                                                                |                                                        | ACYP1                                              |                                                 |                                                                        | CMHR2                                                                     | PPP1CC                                             | AP152                                                                                      |                                                |                                                                | AP0A1                                                                            | PGSMC1                                                                          |                                                         |
|                                                         |                                           |                                                                |                                                        | ADAM21                                             |                                                 |                                                                        | DERL2                                                                     | RAB2A                                              | AQP4                                                                                       |                                                |                                                                | ATP1B1                                                                           | RAB11A                                                                          |                                                         |
|                                                         |                                           |                                                                |                                                        | ADGRG6                                             |                                                 |                                                                        | DGAT2                                                                     | SLC35A2                                            | ARC                                                                                        |                                                |                                                                | ATP2C1                                                                           | RAB6A                                                                           |                                                         |
|                                                         |                                           |                                                                |                                                        | ADHFE1                                             |                                                 |                                                                        | DGKH                                                                      | STT3A                                              | ARL6IP5                                                                                    |                                                |                                                                | BCCIP                                                                            | RPL17                                                                           |                                                         |
|                                                         |                                           |                                                                |                                                        | ADO                                                |                                                 |                                                                        | DISC1                                                                     | YARS2                                              | ARPP21                                                                                     |                                                |                                                                | BEX4                                                                             | RPL31                                                                           |                                                         |
|                                                         |                                           |                                                                |                                                        | ADSS                                               |                                                 |                                                                        | DPP10                                                                     | ASAH1                                              | ASAH1                                                                                      |                                                |                                                                | BMP2                                                                             | STARD10                                                                         |                                                         |
|                                                         |                                           |                                                                |                                                        | ADSSL1                                             |                                                 |                                                                        | FEZ1                                                                      | ATP2A1                                             | ATP2A1                                                                                     |                                                |                                                                | CAB                                                                              | SUB1                                                                            |                                                         |
|                                                         |                                           |                                                                |                                                        | AFTPH                                              |                                                 |                                                                        | GALNS                                                                     | ATP2A2                                             | ATP2A2                                                                                     |                                                |                                                                | CCT2                                                                             | TMED10                                                                          |                                                         |
|                                                         |                                           |                                                                |                                                        | AGFG1                                              |                                                 |                                                                        | GGL                                                                       | ATP5J                                              | ATP5J                                                                                      |                                                |                                                                | CDB3                                                                             | UQC8B                                                                           |                                                         |
|                                                         |                                           |                                                                |                                                        | AGD1                                               |                                                 |                                                                        | GCNT4                                                                     | ATP6V1E1                                           | CA2                                                                                        |                                                |                                                                | CDC42                                                                            |                                                                                 |                                                         |
|                                                         |                                           |                                                                |                                                        | AGD2                                               |                                                 |                                                                        | GNG13                                                                     | B2M                                                | B2M                                                                                        |                                                |                                                                | CDC42EP3                                                                         |                                                                                 |                                                         |
|                                                         |                                           |                                                                |                                                        | AHSA1                                              |                                                 |                                                                        | HSD17B6                                                                   | B3GNT2                                             | B3GNT2                                                                                     |                                                |                                                                | CKM                                                                              |                                                                                 |                                                         |
|                                                         |                                           |                                                                |                                                        | AHSA2                                              |                                                 |                                                                        | IFT20                                                                     | B4GAT1                                             | B4GAT1                                                                                     |                                                |                                                                | CLTB                                                                             |                                                                                 |                                                         |
|                                                         |                                           |                                                                |                                                        | AIMP2                                              |                                                 |                                                                        | JAK1                                                                      | BACE1                                              | BACE1                                                                                      |                                                |                                                                | COL4A1                                                                           |                                                                                 |                                                         |
|                                                         |                                           |                                                                |                                                        | AK8                                                |                                                 |                                                                        | JPH1                                                                      | BAG1                                               | BAG1                                                                                       |                                                |                                                                | CPB2                                                                             |                                                                                 |                                                         |
|                                                         |                                           |                                                                |                                                        | AKRIN2                                             |                                                 |                                                                        | KALRN                                                                     | C2orf40                                            | C2orf40                                                                                    |                                                |                                                                | CXCR6                                                                            |                                                                                 |                                                         |
|                                                         |                                           |                                                                |                                                        | AKR1A1                                             |                                                 |                                                                        | KISS1R                                                                    | C3orf72                                            | C3orf72                                                                                    |                                                |                                                                | DCK                                                                              |                                                                                 |                                                         |
|                                                         |                                           |                                                                |                                                        | AKR1C1                                             |                                                 |                                                                        | LEF1                                                                      | CA2                                                | CA2                                                                                        |                                                |                                                                | DFNB59                                                                           |                                                                                 |                                                         |
|                                                         |                                           |                                                                |                                                        | AKR1C2                                             |                                                 |                                                                        | LMO4                                                                      | CACNA1B                                            | CACNA1B                                                                                    |                                                |                                                                | DHCR24                                                                           |                                                                                 |                                                         |
|                                                         |                                           |                                                                |                                                        | ALDH3A2                                            |                                                 |                                                                        | MAGE12                                                                    | CAMK2G                                             | CAMK2G                                                                                     |                                                |                                                                | DLG1                                                                             |                                                                                 |                                                         |
|                                                         |                                           |                                                                |                                                        | ALG5                                               |                                                 |                                                                        | MCEE                                                                      | CAPRN1                                             | CAPRN1                                                                                     |                                                |                                                                | DNM1L                                                                            |                                                                                 |                                                         |
|                                                         |                                           |                                                                |                                                        | ALG8                                               |                                                 |                                                                        | MDFI                                                                      | CAPZB                                              | CAPZB                                                                                      |                                                |                                                                | EED                                                                              |                                                                                 |                                                         |
|                                                         |                                           |                                                                |                                                        | ALOX5                                              |                                                 |                                                                        | MYOM1                                                                     | CDK5                                               | CDK5                                                                                       |                                                |                                                                | EI24                                                                             |                                                                                 |                                                         |
|                                                         |                                           |                                                                |                                                        | ALOX5AP                                            |                                                 |                                                                        | NDN                                                                       | CHGB                                               | CHGB                                                                                       |                                                |                                                                | FAM149A                                                                          |                                                                                 |                                                         |
|                                                         |                                           |                                                                |                                                        | AMACR                                              |                                                 |                                                                        | NDUFV2                                                                    | CHMP2B                                             | CHMP2B                                                                                     |                                                |                                                                | FAM91A1                                                                          |                                                                                 |                                                         |
|                                                         |                                           |                                                                |                                                        | AMP1C (includes others)                            |                                                 |                                                                        | NEK11                                                                     | CSD2                                               | CSD2                                                                                       |                                                |                                                                | FGFR1                                                                            |                                                                                 |                                                         |
|                                                         |                                           |                                                                |                                                        | ANAPC7                                             |                                                 |                                                                        | NFATC3                                                                    | CLU                                                | CLU                                                                                        |                                                |                                                                | FKBP1A                                                                           |                                                                                 |                                                         |
|                                                         |                                           |                                                                |                                                        | ANKRD10                                            |                                                 |                                                                        | NIFBL                                                                     | CNR1                                               | CNR1                                                                                       |                                                |                                                                | FOXD4L3                                                                          |                                                                                 |                                                         |
|                                                         |                                           |                                                                |                                                        | ANKRD18A                                           |                                                 |                                                                        | NPEPP5                                                                    | COP55                                              | COP55                                                                                      |                                                |                                                                | FOXDL6                                                                           |                                                                                 |                                                         |
|                                                         |                                           |                                                                |                                                        | ANKRD27                                            |                                                 |                                                                        | NPR3                                                                      | COQ2                                               | COQ2                                                                                       |                                                |                                                                | FRG1                                                                             |                                                                                 |                                                         |
|                                                         |                                           |                                                                |                                                        | ANKS1B                                             |                                                 |                                                                        | NUPR1                                                                     | CPE                                                | CPE                                                                                        |                                                |                                                                | GARS                                                                             |                                                                                 |                                                         |
|                                                         |                                           |                                                                |                                                        | ANXA3                                              |                                                 |                                                                        | OBFC1                                                                     | CREM                                               | CREM                                                                                       |                                                |                                                                | GFR4A                                                                            |                                                                                 |                                                         |
|                                                         |                                           |                                                                |                                                        | ANXA9                                              |                                                 |                                                                        | OPN4                                                                      | CSR2                                               | CSR2                                                                                       |                                                |                                                                | GFRAL                                                                            |                                                                                 |                                                         |
|                                                         |                                           |                                                                |                                                        | AP2A2                                              |                                                 |                                                                        | PBX1                                                                      | CYP19A1                                            | CYP19A1                                                                                    |                                                |                                                                | GIB2                                                                             |                                                                                 |                                                         |
|                                                         |                                           |                                                                |                                                        | AP2S1                                              |                                                 |                                                                        | PDE2A                                                                     | DGKB                                               | DGKB                                                                                       |                                                |                                                                | GLRX                                                                             |                                                                                 |                                                         |
|                                                         |                                           |                                                                |                                                        | ARHGAP15                                           |                                                 |                                                                        | PDE9A                                                                     | DHFR                                               | DHFR                                                                                       |                                                |                                                                | GNPTAB                                                                           |                                                                                 |                                                         |
|                                                         |                                           |                                                                |                                                        | ARMC10                                             |                                                 |                                                                        | PLIN2                                                                     | DIRAS2                                             | DIRAS2                                                                                     |                                                |                                                                | GNPTAB                                                                           |                                                                                 |                                                         |
|                                                         |                                           |                                                                |                                                        | ARMCX1                                             |                                                 |                                                                        | POU2F2                                                                    | DNAA1                                              | DNAA1                                                                                      |                                                |                                                                | GUCY1A3                                                                          |                                                                                 |                                                         |
|                                                         |                                           |                                                                |                                                        | ARPCS                                              |                                                 |                                                                        | PPP1R14C                                                                  | DNAB6                                              | DNAB6                                                                                      |                                                |                                                                | HGF                                                                              |                                                                                 |                                                         |
|                                                         |                                           |                                                                |                                                        | ASB4                                               |                                                 |                                                                        | PRDX1                                                                     | DRD1                                               | DRD1                                                                                       |                                                |                                                                | HRASL5                                                                           |                                                                                 |                                                         |
|                                                         |                                           |                                                                |                                                        | ASGR2                                              |                                                 |                                                                        | PRKACB                                                                    | EGR3                                               | EGR3                                                                                       |                                                |                                                                | INSM1                                                                            |                                                                                 |                                                         |
|                                                         |                                           |                                                                |                                                        | ASNSD1                                             |                                                 |                                                                        | PRUHR                                                                     | EIF2B3                                             | EIF2B3                                                                                     |                                                |                                                                | INTU                                                                             |                                                                                 |                                                         |
|                                                         |                                           |                                                                |                                                        | ASPH                                               |                                                 |                                                                        | PSIP1                                                                     | EIF2B5                                             | EIF2B5                                                                                     |                                                |                                                                | ITPA                                                                             |                                                                                 |                                                         |
|                                                         |                                           |                                                                |                                                        | ASUN                                               |                                                 |                                                                        | PTPN2                                                                     | EIF4A2                                             | EIF4A2                                                                                     |                                                |                                                                | KCNQ4                                                                            |                                                                                 |                                                         |
|                                                         |                                           |                                                                |                                                        | ATP1B3                                             |                                                 |                                                                        | RRN3                                                                      | ERCC3                                              | ERCC3                                                                                      |                                                |                                                                | KDM4C                                                                            |                                                                                 |                                                         |
|                                                         |                                           |                                                                |                                                        | ATP5B                                              |                                                 |                                                                        | SDK1                                                                      | ETF8                                               | ETF8                                                                                       |                                                |                                                                | KHDRBS3                                                                          |                                                                                 |                                                         |
|                                                         |                                           |                                                                |                                                        | ATP5G1                                             |                                                 |                                                                        | SEZ6L2                                                                    | FAM117A                                            | FAM117A                                                                                    |                                                |                                                                | KLR2C                                                                            |                                                                                 |                                                         |
|                                                         |                                           |                                                                |                                                        | ATP5J2                                             |                                                 |                                                                        | SNRPN                                                                     | FARS8                                              | FARS8                                                                                      |                                                |                                                                | LDB3                                                                             |                                                                                 |                                                         |
|                                                         |                                           |                                                                |                                                        | ATP6V0B                                            |                                                 |                                                                        | SP4                                                                       | FIG4                                               | FIG4                                                                                       |                                                |                                                                | LGALS8                                                                           |                                                                                 |                                                         |
|                                                         |                                           |                                                                |                                                        | ATP6V1D                                            |                                                 |                                                                        | TLF4                                                                      | GABBR1                                             | GABBR1                                                                                     |                                                |                                                                | LUC7L3                                                                           |                                                                                 |                                                         |
|                                                         |                                           |                                                                |                                                        | AUH                                                |                                                 |                                                                        | TMOD2                                                                     | GABRD                                              | GABRD                                                                                      |                                                |                                                                | MAL                                                                              |                                                                                 |                                                         |
|                                                         |                                           |                                                                |                                                        | AZ12                                               |                                                 |                                                                        | TPST1                                                                     | GAD2                                               | GAD2                                                                                       |                                                |                                                                | MAP2K5                                                                           |                                                                                 |                                                         |
|                                                         |                                           |                                                                |                                                        | AZU1                                               |                                                 |                                                                        | UBE2O1                                                                    | GAP43                                              | GAP43                                                                                      |                                                |                                                                | MARS2                                                                            |                                                                                 |                                                         |
|                                                         |                                           |                                                                |                                                        | BCAM                                               |                                                 |                                                                        | UCHL3                                                                     | GLR8                                               | GLR8                                                                                       |                                                |                                                                | MBD4                                                                             |                                                                                 |                                                         |
|                                                         |                                           |                                                                |                                                        | BCAS2                                              |                                                 |                                                                        | UQCRC2                                                                    | GNAO1                                              | GNAO1                                                                                      |                                                |                                                                | ME2                                                                              |                                                                                 |                                                         |
|                                                         |                                           |                                                                |                                                        | BCKDHA                                             |                                                 |                                                                        | VDAC3                                                                     | GNG3                                               | GNG3                                                                                       |                                                |                                                                | MOB4                                                                             |                                                                                 |                                                         |
|                                                         |                                           |                                                                |                                                        | BCL2L10                                            |                                                 |                                                                        |                                                                           | GRIA4                                              | GRIA4                                                                                      |                                                |                                                                | MPO                                                                              |                                                                                 |                                                         |
|                                                         |                                           |                                                                |                                                        | BCL3                                               |                                                 |                                                                        |                                                                           | GRM1                                               | GRM1                                                                                       |                                                |                                                                | MSRA                                                                             |                                                                                 |                                                         |
|                                                         |                                           |                                                                |                                                        | BCL6B                                              |                                                 |                                                                        |                                                                           | GRM7                                               | GRM7                                                                                       |                                                |                                                                | NHCN                                                                             |                                                                                 |                                                         |
|                                                         |                                           |                                                                |                                                        | BCLAF1                                             |                                                 |                                                                        |                                                                           | GTF3H5                                             | GTF3H5                                                                                     |                                                |                                                                | NAP1L3                                                                           |                                                                                 |                                                         |
|                                                         |                                           |                                                                |                                                        | BDP1                                               |                                                 |                                                                        |                                                                           | HDAC3                                              | HDAC3                                                                                      |                                                |                                                                | NCRI                                                                             |                                                                                 |                                                         |
|                                                         |                                           |                                                                |                                                        | BEX1                                               |                                                 |                                                                        |                                                                           | HINT1                                              | HINT1                                                                                      |                                                |                                                                | NFIL3                                                                            |                                                                                 |                                                         |
|                                                         |                                           |                                                                |                                                        | BEX2                                               |                                                 |                                                                        |                                                                           | HOMER1                                             | HOMER1                                                                                     |                                                |                                                                | NGFRAP1                                                                          |                                                                                 |                                                         |
|                                                         |                                           |                                                                |                                                        | BFS2                                               |                                                 |                                                                        |                                                                           | HRRT1                                              | HRRT1                                                                                      |                                                |                                                                | NNAT                                                                             |                                                                                 |                                                         |
|                                                         |                                           |                                                                |                                                        | BLVRA                                              |                                                 |                                                                        |                                                                           | HRH3                                               | HRH3                                                                                       |                                                |                                                                | NOP56                                                                            |                                                                                 |                                                         |
|                                                         |                                           |                                                                |                                                        | BMP6                                               |                                                 |                                                                        |                                                                           | HSPA5                                              | HSPA5                                                                                      |                                                |                                                                | OSM                                                                              |                                                                                 |                                                         |
|                                                         |                                           |                                                                |                                                        | BMS1                                               |                                                 |                                                                        |                                                                           | HSPFAB                                             | HSPFAB                                                                                     |                                                |                                                                | PAP2B                                                                            |                                                                                 |                                                         |
|                                                         |                                           |                                                                |                                                        | BOD1                                               |                                                 |                                                                        |                                                                           | HSPB1                                              | HSPB1                                                                                      |                                                |                                                                | PCDHGC3                                                                          |                                                                                 |                                                         |
|                                                         |                                           |                                                                |                                                        | BRE                                                |                                                 |                                                                        |                                                                           | HTR5A                                              | HTR5A                                                                                      |                                                |                                                                | PIKFYE                                                                           |                                                                                 |                                                         |
|                                                         |                                           |                                                                |                                                        | BRPF1                                              |                                                 |                                                                        |                                                                           | HTR6                                               | HTR6                                                                                       |                                                |                                                                | PITPNA                                                                           |                                                                                 |                                                         |
|                                                         |                                           |                                                                |                                                        | BRWD1                                              |                                                 |                                                                        |                                                                           | IGF1                                               | IGF1                                                                                       |                                                |                                                                | PITPNC1                                                                          |                                                                                 |                                                         |
|                                                         |                                           |                                                                |                                                        | BTF3                                               |                                                 |                                                                        |                                                                           | IP6K2                                              | IP6K2                                                                                      |                                                |                                                                | POLB                                                                             |                                                                                 |                                                         |
|                                                         |                                           |                                                                |                                                        | BTG3                                               |                                                 |                                                                        |                                                                           | ISOC1                                              | ISOC1                                                                                      |                                                |                                                                | POLE2                                                                            |                                                                                 |                                                         |
|                                                         |                                           |                                                                |                                                        | BUB3                                               |                                                 |                                                                        |                                                                           | ITM2B                                              | ITM2B                                                                                      |                                                |                                                                | POT1                                                                             |                                                                                 |                                                         |
|                                                         |                                           |                                                                |                                                        | C10orf107                                          |                                                 |                                                                        |                                                                           | KCNAS                                              | KCNAS                                                                                      |                                                |                                                                | PPAT                                                                             |                                                                                 |                                                         |
|                                                         |                                           |                                                                |                                                        | C10orf12                                           |                                                 |                                                                        |                                                                           | KNC1                                               | KNC1                                                                                       |                                                |                                                                | PRP51                                                                            |                                                                                 |                                                         |
|                                                         |                                           |                                                                |                                                        | C11orf21                                           |                                                 |                                                                        |                                                                           | KNC2                                               | KNC2                                                                                       |                                                |                                                                | PSMA4                                                                            |                                                                                 |                                                         |
|                                                         |                                           |                                                                |                                                        | C11orf45                                           |                                                 |                                                                        |                                                                           | KCNH2                                              | KCNH2                                                                                      |                                                |                                                                | PSME3                                                                            |                                                                                 |                                                         |
|                                                         |                                           |                                                                |                                                        | C11orf70                                           |                                                 |                                                                        |                                                                           | KCNMA1                                             | KCNMA1                                                                                     |                                                |                                                                | PTGDR                                                                            |                                                                                 |                                                         |
|                                                         |                                           |                                                                |                                                        | C11orf87                                           |                                                 |                                                                        |                                                                           | LAPTM4B                                            | LAPTM4B                                                                                    |                                                |                                                                | PTPN6                                                                            |                                                                                 |                                                         |
|                                                         |                                           |                                                                |                                                        | C12orf29                                           |                                                 |                                                                        |                                                                           | LDHA                                               | LDHA                                                                                       |                                                |                                                                | PTS                                                                              |                                                                                 |                                                         |
|                                                         |                                           |                                                                |                                                        | C12orf45                                           |                                                 |                                                                        |                                                                           | LRG1                                               | LRG1                                                                                       |                                                |                                                                | RAPSN                                                                            |                                                                                 |                                                         |
|                                                         |                                           |                                                                |                                                        | C12orf73                                           |                                                 |                                                                        |                                                                           | LRRN1                                              | LRRN1                                                                                      |                                                |                                                                | RNF213                                                                           |                                                                                 |                                                         |
|                                                         |                                           |                                                                |                                                        | C14orf159                                          |                                                 |                                                                        |                                                                           | MAGED1                                             | MAGED1                                                                                     |                                                |                                                                | SEC61G                                                                           |                                                                                 |                                                         |
|                                                         |                                           |                                                                |                                                        | C16orf58                                           |                                                 |                                                                        |                                                                           | MAP2K4                                             | MAP2K4                                                                                     |                                                |                                                                | SFRP1                                                                            |                                                                                 |                                                         |
|                                                         |                                           |                                                                |                                                        | C16orf91                                           |                                                 |                                                                        |                                                                           | MAPK1                                              | MAPK1                                                                                      |                                                |                                                                | SGCE                                                                             |                                                                                 |                                                         |
|                                                         |                                           |                                                                |                                                        | C18orf8                                            |                                                 |                                                                        |                                                                           | MBP                                                | MBP                                                                                        |                                                |                                                                | SH3GLB1                                                                          |                                                                                 |                                                         |
|                                                         |                                           |                                                                |                                                        | C19orf53                                           |                                                 |                                                                        |                                                                           | MDH1                                               | MDH1                                                                                       |                                                |                                                                | SLC25A38                                                                         |                                                                                 |                                                         |
|                                                         |                                           |                                                                |                                                        | C1orf53                                            |                                                 |                                                                        |                                                                           | MECP2                                              | MECP2                                                                                      |                                                |                                                                | SMAD3                                                                            |                                                                                 |                                                         |
|                                                         |                                           |                                                                |                                                        | C1QTNF3                                            |                                                 |                                                                        |                                                                           | METTL9                                             | METTL9                                                                                     |                                                |                                                                | SOC3                                                                             |                                                                                 |                                                         |
|                                                         |                                           |                                                                |                                                        | C1QTNF9                                            |                                                 |                                                                        |                                                                           | MGAT2                                              | MGAT2                                                                                      |                                                |                                                                | SOX17                                                                            |                                                                                 |                                                         |
|                                                         |                                           |                                                                |                                                        | C1RL                                               |                                                 |                                                                        |                                                                           | MLF1                                               | MLF1                                                                                       |                                                |                                                                | SSTR1                                                                            |                                                                                 |                                                         |
|                                                         |                                           |                                                                |                                                        | C20orf194                                          |                                                 |                                                                        |                                                                           | MM99                                               | MM99                                                                                       |                                                |                                                                | STAG3L1                                                                          |                                                                                 |                                                         |
|                                                         |                                           |                                                                |                                                        | C20orf24                                           |                                                 |                                                                        |                                                                           | MUT                                                | MUT                                                                                        |                                                |                                                                | STAMPB                                                                           |                                                                                 |                                                         |
|                                                         |                                           |                                                                |                                                        | C3orf14                                            |                                                 |                                                                        |                                                                           | MYL12A                                             | MYL12A                                                                                     |                                                |                                                                | STXB1                                                                            |                                                                                 |                                                         |
|                                                         |                                           |                                                                |                                                        | C4orf27                                            |                                                 |                                                                        |                                                                           | NAMPT                                              | NAMPT                                                                                      |                                                |                                                                | TACO1                                                                            |                                                                                 |                                                         |
|                                                         |                                           |                                                                |                                                        | C6orf203                                           |                                                 |                                                                        |                                                                           | NAP1L5                                             | NAP1L5                                                                                     |                                                |                                                                | TEF                                                                              |                                                                                 |                                                         |
|                                                         |                                           |                                                                |                                                        | C6orf25                                            |                                                 |                                                                        |                                                                           | NBEA                                               | NBEA                                                                                       |                                                |                                                                | TMEM126A                                                                         |                                                                                 |                                                         |
|                                                         |                                           |                                                                |                                                        | C7orf72                                            |                                                 |                                                                        |                                                                           | NDUF8                                              | NDUF8                                                                                      |                                                |                                                                | TMEM70                                                                           |                                                                                 |                                                         |
|                                                         |                                           |                                                                |                                                        | C9orf9                                             |                                                 |                                                                        |                                                                           | NDUF83                                             | NDUF83                                                                                     |                                                |                                                                | TP53BP2                                                                          |                                                                                 |                                                         |
|                                                         |                                           |                                                                |                                                        | C9orf91                                            |                                                 |                                                                        |                                                                           | NDUF85                                             | NDUF85                                                                                     |                                                |                                                                | TPP4                                                                             |                                                                                 |                                                         |
|                                                         |                                           |                                                                |                                                        | CADM1                                              |                                                 |                                                                        |                                                                           | NDUF54                                             | NDUF54                                                                                     |                                                |                                                                | TPSYL5                                                                           |                                                                                 |                                                         |
|                                                         |                                           |                                                                |                                                        | CALCR                                              |                                                 |                                                                        |                                                                           | NGLY1                                              | NGLY1                                                                                      |                                                |                                                                | UBE2L3                                                                           |                                                                                 |                                                         |
|                                                         |                                           |                                                                |                                                        | CALN1                                              |                                                 |                                                                        |                                                                           | NHLRC1                                             | NHLRC1                                                                                     |                                                |                                                                | UBE2V2                                                                           |                                                                                 |                                                         |
|                                                         |                                           |                                                                |                                                        | CAMK1                                              |                                                 |                                                                        |                                                                           | NOVA1                                              | NOVA1                                                                                      |                                                |                                                                | YWHAB                                                                            |                                                                                 |                                                         |
|                                                         |                                           |                                                                |                                                        | CAMLG                                              |                                                 |                                                                        |                                                                           | NPM1                                               | NPM1                                                                                       |                                                |                                                                | ZFP36                                                                            |                                                                                 |                                                         |
|                                                         |                                           |                                                                |                                                        | CAP2                                               |                                                 |                                                                        |                                                                           | NR1D1                                              | NR1D1                                                                                      |                                                |                                                                |                                                                                  |                                                                                 |                                                         |

CAV3  
CBR4  
CBWD1  
CCDC13  
CCDC160  
CCDC28A  
CCDC30  
CCDC34  
CCDC62  
CCDC64  
CCDC85A  
CCDC90B  
CCDC96  
CCNL2  
CCNT2  
CCR9  
CT4  
CCZ1  
CCZ1B  
CDS3  
CDS8  
CDS9  
CD9  
CDC123  
CDC37L1  
CDC40  
CDH18  
CDHR1  
CDK17  
CDK7  
CDKL2  
CDKN2AIP  
CEBPE  
CEBP2  
CENPJ  
CEP126  
CEP170  
CEP70  
CES4A  
CFAP20  
CFDP1  
CHAC2  
CHCHD6  
CHML  
CHMP2A  
CHURC1  
CIRH1A  
CIZ1  
CKLF  
CKS1B  
CLASP1  
CLDN10  
CLDN1  
CLEC7A  
CLNS1A  
CNKSR2  
CNOT2  
CNOT4  
CNOT7  
CNTRL  
COG1  
COL16A1  
COMMMD7  
COMMMD8  
COPA  
COPS2  
COQ3  
CORO7  
CORO7-PAM16  
COX17  
CPNE3  
CPSF3  
CPSF6  
CPXCR1  
CREG1  
CRELD2  
CRIPT  
CSNK1G3  
CSRP2BP  
CSTF2T  
CT62  
CT8S  
CTCF  
CTNND1  
CTSG  
CTS5  
CUTA  
CYP2J2  
CYP4F22  
CYTH4  
DBF4  
DCAF10  
DCAF12L2  
DCAF13  
DCAF4L2  
DCUN1D5  
DDOST  
DDX10  
DDX25  
DDX46  
DDX54  
DDX55  
DEFA3 (includes others)  
DEFS1  
DENND2C  
DENND6B  
DERL1  
DFNAS  
DHH  
DHPS  
DHR57  
DIAPH2  
DLD  
DLEC1  
DLL3  
DMD  
DMP1  
DMRT2  
DNAJC12  
DNAJC19  
DNAJC2  
DNAJC24  
DNITIP1  
DPM1  
DSE  
DSEL  
DSTN  
DTNB  
DTWD1

NTAN1  
NTRK3  
OPN1LW  
OSBP18  
OXTR  
PARK7  
PCMT1  
PDE4DIP  
PDYN  
PGR  
PKM  
PLAT  
PLCB1  
POLR2I  
PRKCB  
PRKCI  
RAB39B  
RAC1  
RASGRP2  
RBF1X1  
RNASEH2B  
RTN4  
SAG  
SAMHD1  
SCG2  
SCP2  
SDHA  
SDHB  
SEPF15  
SERPINA1  
SERPINE1  
SGK1  
SLC10A4  
SNCA  
SPP1  
SRD5A1  
SRM  
STOS1A3  
STARD4  
STMN1  
SUCLA2  
TAC1  
TARDBP  
TGM2  
TH  
TLN4  
TP11  
TRESX1  
TSC2  
TSN  
TUBE1  
TUSC3  
UBB  
UCHL1  
XPA  
ZBTB16  
ZIC1  
ZNF706

DYNCL1L1  
DYNCL2L1  
DYNLRB1  
ECHS1  
EDEM2  
EEF1B2  
EEF1E1  
EFCAB2  
EFCAB7  
EHBP1  
EIF1AX  
EIF1B  
EIF2A  
EIF3I  
EIF3J  
EIF3M  
ELF2  
EMC7  
ENKUR  
ENOPH1  
EPC1  
EQTN  
ERGIC3  
ERICHS  
ERLEC1  
EXOC8  
EXT2  
EXTL1  
FAAP2D  
FADS1  
FAHD1  
FAM110C  
FAM122C  
FAM127B  
FAM127C  
FAM150B  
FAM173B  
FAM174A  
FAM186A  
FAM188A  
FAM200B  
FAM218A  
FAM220A  
FAM229B  
FAM45A  
FAM50B  
FAM63A  
FAM92A1  
FAM96A  
FANCF  
FANCL  
FANCM  
FARS2  
FBXO25  
FBXO3  
FBXO34  
FCAR  
FCHO1  
FCMR  
FEZ2  
FGD1  
FGFY  
FH  
FIBIN  
FIGNL1  
FKBP1B  
FKBP3  
FOPNL  
FOXD4  
FOXDL1  
FOXNA  
FPR1  
FPR2  
FRA10AC1  
FRAS1  
FRG2  
FRG2B  
FRZB  
FJUNC2  
FUT5  
FXR1  
GAB3  
GABARAPL2  
GCOM1  
GDE1  
GDF7  
GEMIN2  
GEMIN8  
GSA1  
GGH  
GH2  
GJA3  
GK  
GKAP1  
GLCC1  
GLIPR1  
GLRX2  
GLRX3  
GLTP  
GLTSCR1  
GMNN  
GNPAT  
GNPDA2  
GNRH1  
GNRH2  
GOLGB1  
GORAB  
GPKOW  
GPR12  
GPR22  
GPR3  
GPRIN3  
GPK7  
GRB10  
GRB2  
GREM2  
GREPE1  
GSG1  
GSTA4  
GSTCD  
GTF2B  
GTF2E2  
GYG1  
H2AFY  
HABP4  
HAMP  
HAPLN4  
HIBCH  
HIST1H2BD

HIST4H4  
HNRRNPA0  
HNRRNPA3  
HOND1  
HPCAL4  
HS2ST1  
HS6ST3  
HSPA12A  
IBAS7  
IDH3A  
ID1  
IFT43  
IFT52  
IFT57  
IGFBPL1  
IGLL1  
IGLL5  
IGSF1  
IL4R  
IMPG1  
IMPG2  
ING4  
ING5  
INPP5K  
INTS10  
IQGAP3  
IRX1  
ITM2A  
IWS1  
IYD  
JAZF1  
KBTBD3  
KBTBD6  
KBTBD7  
KCNG3  
KCTD8  
KHDC1  
KIAA0513  
KIAA0895  
KIAA1429  
KIAA1841  
KIF25  
KLF13  
KLHDC2  
KLHL22  
KLHL33  
KLK3  
KLK9  
KPNA4  
KRT222  
KRT32  
KRT72  
KRTAP1-3  
KTI12  
KTN1  
LACTB  
LACTB2  
LANCL2  
LAPTM4A  
LAPTM5  
LCMT1  
LGALS3BP  
LIAS  
LILRA2  
LILRA4  
LILRA5  
LILRB1  
LIPT2  
LPH  
LMBRD1  
LRP11  
LRPPRC  
LRRC34  
LRRC37B  
LRRC40  
LRRC8D  
LRRTM4  
LTAH  
LXN  
LYPLA1  
LYSMD3  
LZIC  
MAB21L2  
MADCAM1  
MAEL  
MAGEE1  
MAGEE2  
MAGEH1  
MALSU1  
MAN2B2  
MANBA  
MAP4  
MAPKAPK5  
MARCH2  
MATN2  
MBP  
MDH2  
MECR  
MED10  
MED12L  
METAP2  
METTL10  
METTL18  
METTL3  
METTL5  
MGAT1  
MIDN  
MITD1  
MLL74  
MMAB  
MNAT1  
MORN2  
MORN4  
MOV10L1  
MPHOSPH6  
MPP5  
MPP6  
MPPED2  
MRPL15  
MRPL18  
MRPL22  
MRPL44  
MRPL47  
MRPL50  
MRPS11  
MRPS14  
MRPS23  
MRPS28  
MRPS5

MRP59  
MS4A7  
MSANTD2  
MSH5  
MSLN  
MTHFD1  
MTMR11  
MTRF1L  
MX2  
MYNN  
MZT1  
NAA20  
NAA40  
NAA60  
NAALAD2  
NACA  
NAF1  
NANS  
NAP1L2  
NCKAP1  
NCCO4E  
NDUFAB1  
NDUFB4  
NEDD8  
NETO2  
NFS1  
NFU1  
NGDN  
NIN  
NIPSNAP3B  
NME5  
NOA1  
NOV  
NOX5  
NPHP1  
NPRL2  
NR1B3  
NRBF2  
NSMCE2  
NSMCE4A  
NUB1  
NUCB2  
NUDCD2  
NUDT15  
NUDT16  
NUPF1  
NUMB1  
NUP160  
NUPR1L  
NUS1  
NXPE1  
OASL  
OCA2  
OCAD1  
OCAD2  
ODF2L  
ONECUT3  
OR13C4  
OR1D2  
OR2B11  
OR6V1  
ORADV1  
OSCF1  
OSER1  
OTUB1  
PABPC1L2A  
PABPC3  
PAM  
PANX2  
PAXP1  
PCCA  
PCDH10  
PCDH810  
PCDH814  
PCDH84  
PCDH86  
PCID2  
PDCD2L  
PDCD5  
PDES0  
PDHA1  
PDHB  
PDIA2  
PDIA6  
PEL1  
PELO  
PGAIP2  
PHACTR4  
PHF20L1  
PHOSPHO2  
PIAS2  
PIGX  
PIP  
PITPNM3  
PIWIL4  
PLGRKT  
PLPP1  
PNO1  
POGZ  
POLR1D  
POLR2B  
POLR2H  
POM121  
POM121C  
POP4  
POLIF2  
PPA1  
PPA2  
PPCS  
PPFIA1  
PPHLN1  
PPHLAG (includes others)  
PPH6  
PPP1R14D  
PPP1R21  
PPP1R42  
PPP1R7  
PPP5C  
PRAMEF12  
PRDM4  
PRMT6  
PRSS23  
PSMA1  
PSMA3  
PSMA7  
PSMB1  
PSMB2  
PSMD1  
PSMD10

PSMD14  
PSMD6  
PSMG2  
PSMG4  
PSPC1  
PSTK  
PTBP1  
PTCD3  
PTGR1  
PTPMT1  
PVRL2  
PWP1  
PYHIN1  
QKI  
RAB33A  
RAB40A  
RAB9A  
RAB9B  
RABEPK  
RABGGTB  
RAD50  
RAD51C  
RALYL  
RAMP3  
RANBP3L  
RARRES1  
RARS  
RAVER1  
RBP5  
RBP7  
RBFA  
RBM10  
RBM11  
RBM12B  
RBM38  
RBM4  
RBM47  
RBM5  
RBP1  
RCHY1  
RCN1  
RCN2  
RDH14  
RELL2  
REFIN1  
REFS2  
REXO2  
RFC3  
RFK  
RGAG4  
RHOF  
RHOT1  
RIMBP3 (includes others)  
RICK2  
RIPPLY2  
RIT2  
RNF11  
RNF175  
RNF32  
RNH1  
RNMT  
RPAIN  
RPE  
RPL6  
RPRD1A  
RPS6KA1  
RPUSO3  
RQCD1  
RRP36  
RTCB  
RTN3  
RUFY1  
RUFY2  
RUFY3  
S100A12  
S100A8  
S1PR4  
SAMM50  
SARS2  
SAT2  
SAV1  
SBSN  
SCAMP3  
SCUBE1  
SDCCAG8  
SDHD  
SEHL  
SEPT8  
SERPINB1  
SETD3  
SETD4  
SFRP5  
SFT2D1  
SFXN4  
SGCB  
SGP2  
SH3TC1  
SH3YL1  
SHISA2  
SHISA9  
SIRT5  
SLBP  
SLC22A1  
SLC22A25  
SLC25A12  
SLC25A14  
SLC25A3  
SLC25A4  
SLC27A6  
SLC30A1  
SLC35E2  
SLC38A6  
SMC8  
SMIM11A  
SMYD3  
SNRPF  
SNX2  
SNX3  
SNX7  
SORBS3  
SPI00  
SP5  
SPAG7  
SPATA33  
SPATASL1  
SPCS1  
SPCS2  
SPEF2  
SPIN4

SPN  
SPOOL  
SPPL2A  
SPRYD7  
SPTB  
SQLE  
SRD5A3  
SRI  
SRP19  
SRP9  
SRSF7  
SSBP1  
SSBP2  
SSH1  
STGGALNAC3  
STAM2  
STAMBPL1  
STAR9  
STAU2  
STBD1  
STK17A  
STMN2  
STRIP2  
STXBP3  
STXBP6  
SUGT1  
SULT1A2  
SUP7L  
SUSD4  
SYCE1  
SYT16  
SYT8  
TAC3  
TAF1C  
TAF9  
TAGAP  
TAMM41  
TACK3  
TATDN1  
TAX1BP1  
TBX22  
TCAF2  
TCEAL5  
TCTEX1D2  
TDR06  
TFEC  
TFE1  
THBS4  
THYN1  
TIGD2  
TIGD7  
TIMM21  
TMBIM4  
TMEFF2  
TMEM116  
TMEM128  
TMEM148  
TMEM183A  
TMEM19  
TMEM215  
TMEM246  
TMEM33  
TMEM41A  
TMEM45A  
TMEM50A  
TMEM50B  
TMEM55B  
TMEM59  
TMEM98  
TMPRSS4  
TMSB15A  
TNFSF9  
TPDS2L1  
TPM1  
TPMT  
TPRKB  
TRA2B  
TRAM1L1  
TRAPP4  
TRIM23  
TRIM25  
TRIM32  
TRIM36  
TRIM37  
TRIM47  
TRIM48  
TRIP4  
TRMT12  
TRMT5  
TRMT61B  
TRNT1  
TRO  
TSFM  
TSPAN1  
TSPAN15  
TSPAN2  
TSPYL2  
TSR2  
TSTD1  
TTC21B  
TTC30B  
TTC9C  
TULP3  
TVP23C  
TXNDC15  
TXNDC9  
TXNLI  
UAP1  
UBE2B  
UBE2N  
UBE2T  
UBOX5  
UCHL5  
UFSP2  
UHRE1BP1L  
USP42  
USP47  
UTP11L  
UTP18  
VAMP4  
VDAC2  
VPS13C  
VPS13D  
VPS33B  
VRK1  
VSTM2B  
VWC2  
WDR33  
WDR41

WDR54  
WDR61  
WDR82  
WDHFW1  
WSCD2  
WTAP  
WWC2  
WWP1  
XPO1  
XRR1  
YEATS4  
YIP1  
YIP7  
YWHAQ  
YY2  
ZADH2  
ZBTB2  
ZBTB20  
ZBTB39  
ZC3H14  
ZC3H15  
ZC3HAV1  
ZCCHC12  
ZDBF2  
ZDHH15  
ZDHH16  
ZFAND2A  
ZFAND5  
ZFAT  
ZFP62  
ZFFM1  
ZFYVE21  
ZMAT4  
ZNF135  
ZNF138  
ZNF14  
ZNF197  
ZNF302  
ZNF320  
ZNF384  
ZNF418  
ZNF510  
ZNF594  
ZNF626  
ZNF638  
ZNF654  
ZNF655  
ZNF675  
ZNF677  
ZNF688  
ZNF708  
ZNF737  
ZNF774  
ZNF791  
ZNF792  
ZNF793  
ZNF814  
ZNF879  
ZW10  
ZWINT  
ZXD8
